# Supplementary material for: Nrf2 overexpression rescues the RPE in mouse models of retinitis pigmentosa
Source: PubMed Central journal article supplement (PMC7934854; doi:10.1172/jci.insight.145029), 2021-01-25
Supplement: jciinsight-6-145029-s248.pdf [file jciinsight-6-145029-s248.pdf]

## Supplemental Table 1

### Top 30 GO Biological Processes

#### Wild type P40

|    | <b>ID</b>  | <b>Description</b>                                                                                                                                             | <b>Gene Ratio</b> | <b>BgRatio</b> | <b>Pvalue</b> | <b>Padjust</b> |
|----|------------|----------------------------------------------------------------------------------------------------------------------------------------------------------------|-------------------|----------------|---------------|----------------|
| 1  | GO:0002443 | leukocyte mediated immunity                                                                                                                                    | 79/1648           | 354/20604      | 3.05E-17      | 1.72E-13       |
| 2  | GO:0006749 | glutathione metabolic process                                                                                                                                  | 26/1648           | 49/20604       | 2.38E-16      | 6.73E-13       |
| 3  | GO:0006909 | phagocytosis                                                                                                                                                   | 48/1648           | 175/20604      | 1.48E-14      | 2.78E-11       |
| 4  | GO:0002250 | adaptive immune response<br>adaptive immune response based on<br>somatic recombination of immune receptors<br>built from immunoglobulin superfamily<br>domains | 81/1648           | 412/20604      | 2.45E-14      | 3.46E-11       |
| 5  | GO:0002460 | myeloid leukocyte activation                                                                                                                                   | 62/1648           | 289/20604      | 5.26E-13      | 5.33E-10       |
| 6  | GO:0002274 | myeloid leukocyte activation                                                                                                                                   | 48/1648           | 192/20604      | 6.57E-13      | 5.33E-10       |
| 7  | GO:0051186 | cofactor metabolic process<br>antigen processing and presentation of<br>peptide antigen                                                                        | 85/1648           | 470/20604      | 7.25E-13      | 5.33E-10       |
| 8  | GO:0048002 | lymphocyte mediated immunity                                                                                                                                   | 26/1648           | 64/20604       | 7.54E-13      | 5.33E-10       |
| 9  | GO:0002449 | lymphocyte mediated immunity                                                                                                                                   | 59/1648           | 271/20604      | 9.96E-13      | 6.25E-10       |
| 10 | GO:0002694 | regulation of leukocyte activation                                                                                                                             | 87/1648           | 496/20604      | 2.21E-12      | 1.25E-09       |
| 11 | GO:0002703 | regulation of leukocyte mediated immunity<br>positive regulation of immune effector<br>process                                                                 | 53/1648           | 234/20604      | 2.81E-12      | 1.45E-09       |
| 12 | GO:0002699 | regulation of immune effector process                                                                                                                          | 53/1648           | 243/20604      | 1.32E-11      | 6.20E-09       |
| 13 | GO:0002697 | regulation of immune effector process                                                                                                                          | 72/1648           | 390/20604      | 1.57E-11      | 6.83E-09       |
| 14 | GO:0019882 | antigen processing and presentation                                                                                                                            | 31/1648           | 100/20604      | 2.15E-11      | 8.66E-09       |
| 15 | GO:0050867 | positive regulation of cell activation<br>cellular modified amino acid metabolic<br>process                                                                    | 62/1648           | 318/20604      | 3.95E-11      | 1.49E-08       |
| 16 | GO:0006575 | positive regulation of cell activation<br>cellular modified amino acid metabolic<br>process                                                                    | 40/1648           | 160/20604      | 5.41E-11      | 1.91E-08       |
| 17 | GO:0050900 | leukocyte migration<br>positive regulation of response to external<br>stimulus                                                                                 | 62/1648           | 325/20604      | 1.01E-10      | 3.37E-08       |
| 18 | GO:0032103 | leukocyte migration<br>positive regulation of response to external<br>stimulus                                                                                 | 57/1648           | 287/20604      | 1.14E-10      | 3.59E-08       |
| 19 | GO:0016053 | organic acid biosynthetic process                                                                                                                              | 63/1648           | 339/20604      | 2.21E-10      | 6.58E-08       |
| 20 | GO:0002696 | positive regulation of leukocyte activation                                                                                                                    | 58/1648           | 304/20604      | 4.04E-10      | 1.14E-07       |
| 21 | GO:0046394 | carboxylic acid biosynthetic process                                                                                                                           | 62/1648           | 338/20604      | 5.30E-10      | 1.43E-07       |
| 22 | GO:0006790 | sulfur compound metabolic process                                                                                                                              | 52/1648           | 260/20604      | 5.74E-10      | 1.47E-07       |
| 23 | GO:0072593 | reactive oxygen species metabolic process                                                                                                                      | 54/1648           | 276/20604      | 6.25E-10      | 1.53E-07       |
| 24 | GO:0099024 | plasma membrane invagination                                                                                                                                   | 21/1648           | 56/20604       | 7.11E-10      | 1.67E-07       |
| 25 | GO:0030595 | leukocyte chemotaxis                                                                                                                                           | 45/1648           | 210/20604      | 8.32E-10      | 1.88E-07       |
| 26 | GO:0060326 | cell chemotaxis                                                                                                                                                | 56/1648           | 295/20604      | 9.81E-10      | 2.13E-07       |
| 27 | GO:0010324 | membrane invagination<br>positive regulation of leukocyte mediated<br>immunity                                                                                 | 22/1648           | 63/20604       | 1.37E-09      | 2.84E-07       |
| 28 | GO:0002705 | membrane invagination<br>positive regulation of leukocyte mediated<br>immunity                                                                                 | 38/1648           | 163/20604      | 1.41E-09      | 2.84E-07       |
| 29 | GO:0002819 | regulation of adaptive immune response<br>negative regulation of immune system<br>process                                                                      | 42/1648           | 193/20604      | 1.85E-09      | 3.60E-07       |
| 30 | GO:0002683 | regulation of adaptive immune response<br>negative regulation of immune system<br>process                                                                      | 74/1648           | 453/20604      | 2.68E-09      | 5.05E-07       |

**rd1 P20**

|    | <b>ID</b>  | <b>Description</b>                                                   | <b>Gene Ratio</b> | <b>BgRatio</b> | <b>Pvalue</b> | <b>Padjust</b> |
|----|------------|----------------------------------------------------------------------|-------------------|----------------|---------------|----------------|
| 1  | GO:0050953 | sensory perception of light stimulus                                 | 53/2024           | 144/19631      | 2.02E-17      | 7.48E-14       |
| 2  | GO:0007601 | visual perception                                                    | 52/2024           | 140/19631      | 2.56E-17      | 7.48E-14       |
| 3  | GO:0006749 | glutathione metabolic process                                        | 23/2024           | 49/19631       | 7.29E-11      | 1.42E-07       |
| 4  | GO:0060041 | retina development in camera-type eye                                | 43/2024           | 146/19631      | 1.09E-10      | 1.59E-07       |
| 5  | GO:0001505 | regulation of neurotransmitter levels                                | 78/2024           | 367/19631      | 3.72E-10      | 4.23E-07       |
| 6  | GO:0051186 | cofactor metabolic process                                           | 93/2024           | 470/19631      | 4.35E-10      | 4.23E-07       |
| 7  | GO:0009636 | response to toxic substance                                          | 68/2024           | 318/19631      | 3.80E-09      | 2.81E-06       |
| 8  | GO:0009583 | detection of light stimulus                                          | 21/2024           | 49/19631       | 3.85E-09      | 2.81E-06       |
| 9  | GO:0043523 | regulation of neuron apoptotic process                               | 57/2024           | 254/19631      | 1.13E-08      | 6.71E-06       |
| 10 | GO:0051402 | neuron apoptotic process                                             | 61/2024           | 280/19631      | 1.15E-08      | 6.71E-06       |
| 11 | GO:0007602 | phototransduction                                                    | 15/2024           | 28/19631       | 1.53E-08      | 8.10E-06       |
| 12 | GO:0042461 | photoreceptor cell development                                       | 21/2024           | 53/19631       | 2.09E-08      | 1.01E-05       |
| 13 | GO:0050806 | positive regulation of synaptic transmission                         | 46/2024           | 193/19631      | 4.27E-08      | 1.91E-05       |
| 14 | GO:0051188 | cofactor biosynthetic process                                        | 51/2024           | 225/19631      | 4.67E-08      | 1.95E-05       |
| 15 | GO:1990748 | cellular detoxification                                              | 14/2024           | 28/19631       | 1.45E-07      | 5.65E-05       |
| 16 | GO:0048167 | regulation of synaptic plasticity<br>modulation of chemical synaptic | 46/2024           | 204/19631      | 2.46E-07      | 8.97E-05       |
| 17 | GO:0050804 | transmission                                                         | 88/2024           | 499/19631      | 3.31E-07      | 0.00011376     |
| 18 | GO:0099177 | regulation of trans-synaptic signaling                               | 88/2024           | 500/19631      | 3.62E-07      | 0.00011749     |
| 19 | GO:1901214 | regulation of neuron death                                           | 67/2024           | 351/19631      | 4.75E-07      | 0.00014588     |
| 20 | GO:0098754 | detoxification                                                       | 16/2024           | 39/19631       | 5.72E-07      | 0.00016702     |
| 21 | GO:0042391 | regulation of membrane potential                                     | 77/2024           | 427/19631      | 7.33E-07      | 0.00020376     |
| 22 | GO:0005996 | monosaccharide metabolic process                                     | 51/2024           | 247/19631      | 1.00E-06      | 0.00025824     |
| 23 | GO:0042462 | eye photoreceptor cell development                                   | 15/2024           | 36/19631       | 1.02E-06      | 0.00025824     |
| 24 | GO:0010035 | response to inorganic substance                                      | 77/2024           | 431/19631      | 1.07E-06      | 0.00025915     |
| 25 | GO:0070997 | neuron death                                                         | 71/2024           | 389/19631      | 1.25E-06      | 0.00027743     |
| 26 | GO:0072593 | reactive oxygen species metabolic process                            | 55/2024           | 276/19631      | 1.25E-06      | 0.00027743     |
| 27 | GO:0006836 | neurotransmitter transport                                           | 58/2024           | 297/19631      | 1.28E-06      | 0.00027743     |
| 28 | GO:0010038 | response to metal ion                                                | 53/2024           | 263/19631      | 1.36E-06      | 0.00028256     |
| 29 | GO:0046530 | photoreceptor cell differentiation                                   | 22/2024           | 72/19631       | 1.90E-06      | 0.00038326     |
| 30 | GO:0009584 | detection of visible light                                           | 13/2024           | 30/19631       | 3.17E-06      | 0.00061582     |

**rd1 P40**

|    | <b>ID</b>  | <b>Description</b>                             | <b>Gene Ratio</b> | <b>BgRatio</b> | <b>Pvalue</b> | <b>Padjust</b> |
|----|------------|------------------------------------------------|-------------------|----------------|---------------|----------------|
| 1  | GO:0050953 | sensory perception of light stimulus           | 48/1315           | 144/20604      | 2.19E-22      | 1.14E-18       |
| 2  | GO:0007601 | visual perception                              | 47/1315           | 140/20604      | 4.27E-22      | 1.14E-18       |
| 3  | GO:0006749 | glutathione metabolic process                  | 21/1315           | 49/20604       | 4.78E-13      | 6.40E-10       |
| 4  | GO:0009583 | detection of light stimulus                    | 21/1315           | 49/20604       | 4.78E-13      | 6.40E-10       |
| 5  | GO:0007602 | phototransduction                              | 14/1315           | 28/20604       | 2.99E-10      | 3.21E-07       |
| 6  | GO:0006575 | cellular modified amino acid metabolic process | 33/1315           | 160/20604      | 1.65E-09      | 1.48E-06       |
| 7  | GO:0009582 | detection of abiotic stimulus                  | 28/1315           | 122/20604      | 2.28E-09      | 1.74E-06       |
| 8  | GO:0009581 | detection of external stimulus                 | 28/1315           | 123/20604      | 2.77E-09      | 1.86E-06       |
| 9  | GO:0046942 | carboxylic acid transport                      | 47/1315           | 294/20604      | 5.17E-09      | 3.08E-06       |
| 10 | GO:0015849 | organic acid transport                         | 47/1315           | 295/20604      | 5.78E-09      | 3.10E-06       |
| 11 | GO:0009584 | detection of visible light                     | 13/1315           | 30/20604       | 1.18E-08      | 5.76E-06       |
| 12 | GO:0009636 | response to toxic substance                    | 50/1315           | 334/20604      | 1.58E-08      | 7.05E-06       |
| 13 | GO:0006790 | sulfur compound metabolic process              | 42/1315           | 260/20604      | 2.47E-08      | 1.02E-05       |
| 14 | GO:0051186 | cofactor metabolic process                     | 62/1315           | 470/20604      | 4.26E-08      | 1.63E-05       |
| 15 | GO:0043523 | regulation of neuron apoptotic process         | 40/1315           | 255/20604      | 1.20E-07      | 4.21E-05       |
| 16 | GO:0015711 | organic anion transport                        | 54/1315           | 398/20604      | 1.26E-07      | 4.21E-05       |
| 17 | GO:0051187 | cofactor catabolic process                     | 16/1315           | 55/20604       | 1.92E-07      | 6.05E-05       |
| 18 | GO:0051402 | neuron apoptotic process                       | 42/1315           | 282/20604      | 2.53E-07      | 7.54E-05       |
| 19 | GO:0034764 | positive regulation of transmembrane transport | 35/1315           | 217/20604      | 3.67E-07      | 0.00010075     |
| 20 | GO:0072593 | reactive oxygen species metabolic process      | 41/1315           | 276/20604      | 3.76E-07      | 0.00010075     |
| 21 | GO:1901214 | regulation of neuron death                     | 48/1315           | 352/20604      | 5.37E-07      | 0.00013712     |
| 22 | GO:0050890 | cognition                                      | 44/1315           | 311/20604      | 5.73E-07      | 0.00013947     |
| 23 | GO:0032147 | activation of protein kinase activity          | 37/1315           | 242/20604      | 6.73E-07      | 0.00015676     |
| 24 | GO:0042461 | photoreceptor cell development                 | 16/1315           | 60/20604       | 7.12E-07      | 0.00015899     |
| 25 | GO:0006911 | phagocytosis                                   | 14/1315           | 47/20604       | 8.08E-07      | 0.00016995     |
| 26 | GO:0048871 | multicellular organismal homeostasis           | 58/1315           | 466/20604      | 8.25E-07      | 0.00016995     |
| 27 | GO:0034765 | regulation of ion transmembrane transport      | 56/1315           | 453/20604      | 1.58E-06      | 0.00030619     |
| 28 | GO:0006979 | response to oxidative stress                   | 51/1315           | 398/20604      | 1.60E-06      | 0.00030619     |
| 29 | GO:0070997 | neuron death                                   | 50/1315           | 391/20604      | 2.14E-06      | 0.00039613     |
| 30 | GO:0009416 | response to light stimulus                     | 40/1315           | 285/20604      | 2.26E-06      | 0.00040358     |

## Untreated

|    | <b>ID</b>  | <b>Description</b>                                     | <b>Gene Ratio</b> | <b>BgRatio</b> | <b>Pvalue</b> | <b>Padjust</b> |
|----|------------|--------------------------------------------------------|-------------------|----------------|---------------|----------------|
| 1  | GO:0033108 | mitochondrial respiratory chain complex assembly       | 45/3196           | 74/19631       | 5.64E-18      | 3.37E-14       |
| 2  | GO:0022613 | ribonucleoprotein complex biogenesis                   | 129/3196          | 402/19631      | 2.07E-15      | 6.19E-12       |
| 3  | GO:0010257 | NADH dehydrogenase complex assembly                    | 29/3196           | 43/19631       | 9.01E-14      | 1.35E-10       |
| 4  | GO:0032981 | mitochondrial respiratory chain complex I assembly     | 29/3196           | 43/19631       | 9.01E-14      | 1.35E-10       |
| 5  | GO:0007005 | mitochondrion organization                             | 132/3196          | 443/19631      | 5.13E-13      | 6.13E-10       |
| 6  | GO:0042254 | ribosome biogenesis                                    | 88/3196           | 260/19631      | 2.34E-12      | 2.33E-09       |
| 7  | GO:0016072 | rRNA metabolic process                                 | 75/3196           | 209/19631      | 3.85E-12      | 3.28E-09       |
| 8  | GO:0006364 | rRNA processing                                        | 67/3196           | 179/19631      | 5.99E-12      | 4.48E-09       |
| 9  | GO:0034470 | ncRNA processing                                       | 102/3196          | 327/19631      | 1.21E-11      | 8.03E-09       |
| 10 | GO:0022900 | electron transport chain                               | 38/3196           | 86/19631       | 9.59E-10      | 5.73E-07       |
| 11 | GO:0022904 | respiratory electron transport chain                   | 36/3196           | 80/19631       | 1.43E-09      | 7.75E-07       |
| 12 | GO:0006119 | oxidative phosphorylation                              | 39/3196           | 91/19631       | 1.72E-09      | 8.07E-07       |
| 13 | GO:0034660 | ncRNA metabolic process                                | 121/3196          | 442/19631      | 1.76E-09      | 8.07E-07       |
| 14 | GO:0008380 | RNA splicing                                           | 101/3196          | 354/19631      | 3.72E-09      | 1.59E-06       |
| 15 | GO:0042775 | mitochondrial ATP synthesis coupled electron transport | 28/3196           | 57/19631       | 8.52E-09      | 3.39E-06       |
| 16 | GO:0042773 | ATP synthesis coupled electron transport               | 29/3196           | 61/19631       | 1.20E-08      | 4.47E-06       |
| 17 | GO:0022618 | ribonucleoprotein complex assembly                     | 67/3196           | 211/19631      | 1.78E-08      | 6.26E-06       |
| 18 | GO:0071826 | ribonucleoprotein complex subunit organization         | 69/3196           | 224/19631      | 4.27E-08      | 1.42E-05       |
| 19 | GO:0045333 | cellular respiration                                   | 53/3196           | 157/19631      | 5.71E-08      | 1.80E-05       |
| 20 | GO:0032543 | mitochondrial translation                              | 31/3196           | 72/19631       | 6.88E-08      | 2.06E-05       |
| 21 | GO:0006397 | mRNA processing                                        | 112/3196          | 432/19631      | 1.64E-07      | 4.68E-05       |
| 22 | GO:0009141 | nucleoside triphosphate metabolic process              | 76/3196           | 272/19631      | 7.54E-07      | 0.00020482     |
| 23 | GO:0009205 | purine ribonucleoside triphosphate metabolic process   | 69/3196           | 248/19631      | 2.81E-06      | 0.00073062     |
| 24 | GO:0140053 | mitochondrial gene expression                          | 34/3196           | 96/19631       | 3.91E-06      | 0.00097314     |
| 25 | GO:0015980 | energy derivation by oxidation of organic compounds    | 68/3196           | 246/19631      | 4.22E-06      | 0.00100958     |
| 26 | GO:0009144 | purine nucleoside triphosphate metabolic process       | 70/3196           | 256/19631      | 4.65E-06      | 0.00106944     |
| 27 | GO:0009199 | ribonucleoside triphosphate metabolic process          | 69/3196           | 252/19631      | 5.15E-06      | 0.00114065     |
| 28 | GO:0000375 | RNA splicing                                           | 66/3196           | 239/19631      | 6.01E-06      | 0.00119821     |
| 29 | GO:0000377 | RNA splicing                                           | 66/3196           | 239/19631      | 6.01E-06      | 0.00119821     |
| 30 | GO:0000398 | mRNA splicing                                          | 66/3196           | 239/19631      | 6.01E-06      | 0.00119821     |

**Supplemental Figure 1.** Plot showing the number of cone photoreceptors counted in the central retina of P40-P60 mice, where the majority of degeneration takes place, as a ratio of total number of cone photoreceptors in a retina (to normalize for any variations in injection and infection efficiency across different retinas). Data shown as mean  $\pm$  s.d. ( $n = 9$  mice).

**Ratio Best1 hNrf2 Paired Data Only Ratio**

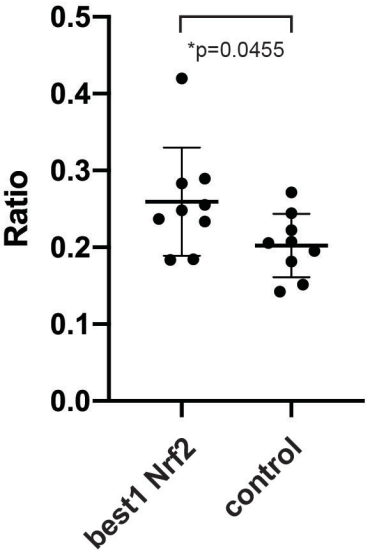

**Supplemental Figure 2.** KEGG pathways for glutathione metabolism for each comparison.

Enzymes in red have increased expression levels whereas enzymes in green have decreased expression level. For Nrf2 treated tissue across all three comparisons (P20 *rd1* Nrf2 treated vs untreated, P40 *rd1* Nrf2 treated vs untreated, wild type Nrf2 treated vs untreated) there was upregulation of several enzymes in the glutathione pathway (in red). These enzymes were downregulated when comparing P40 to P20 untreated *rd1* (green).

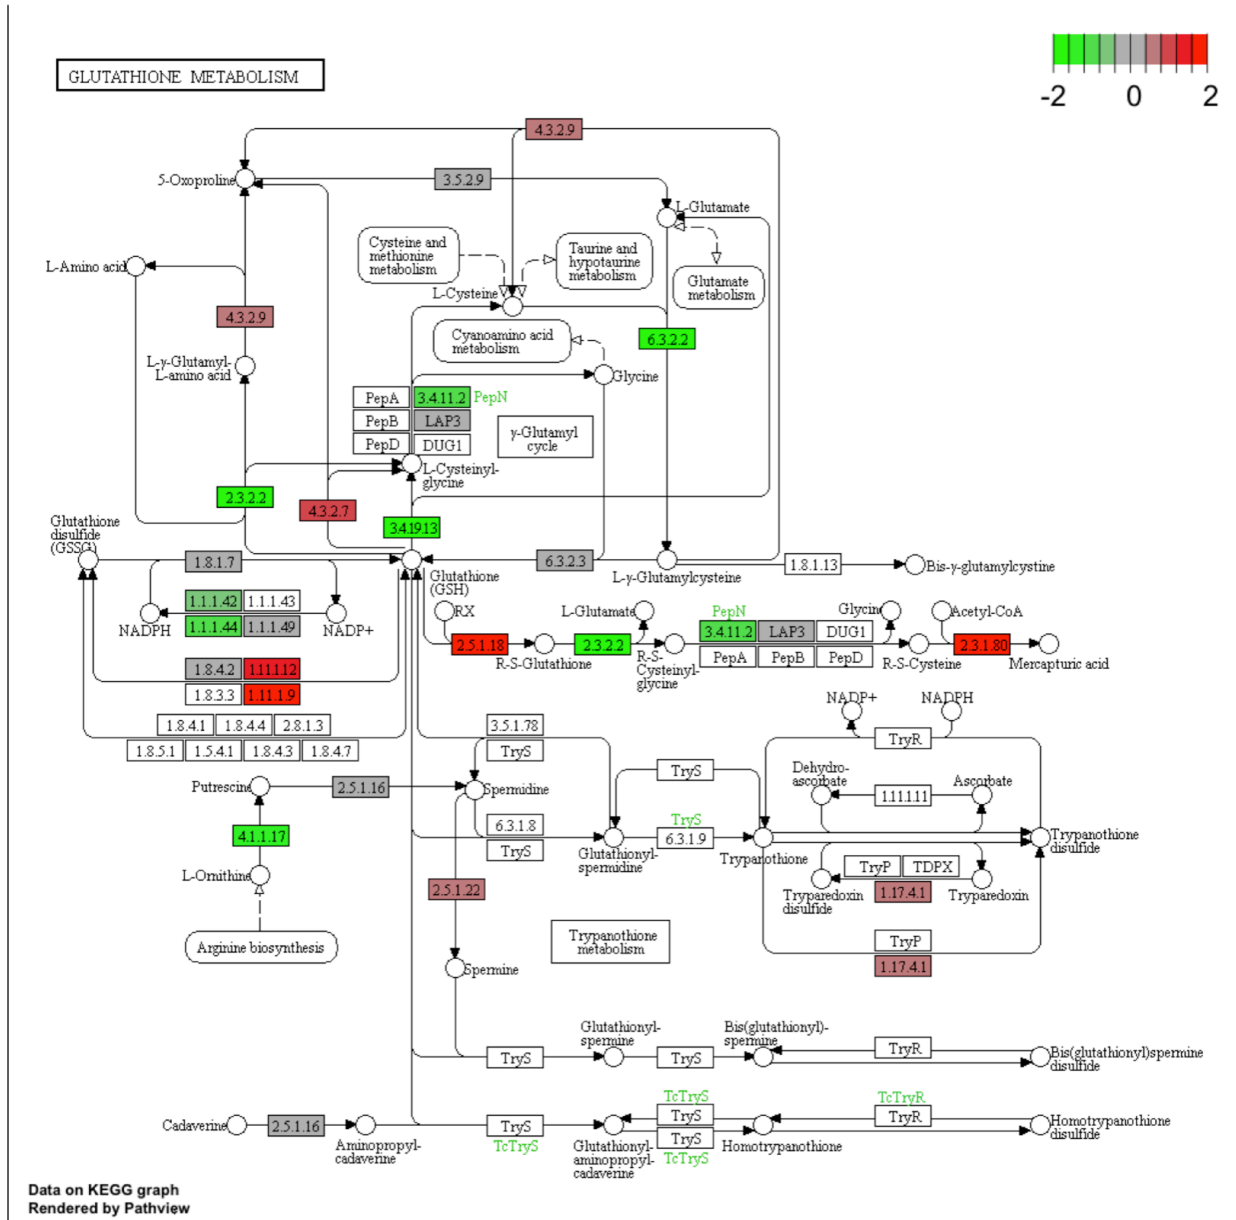

Untreated *rd1* p40 vs *rd1* p20

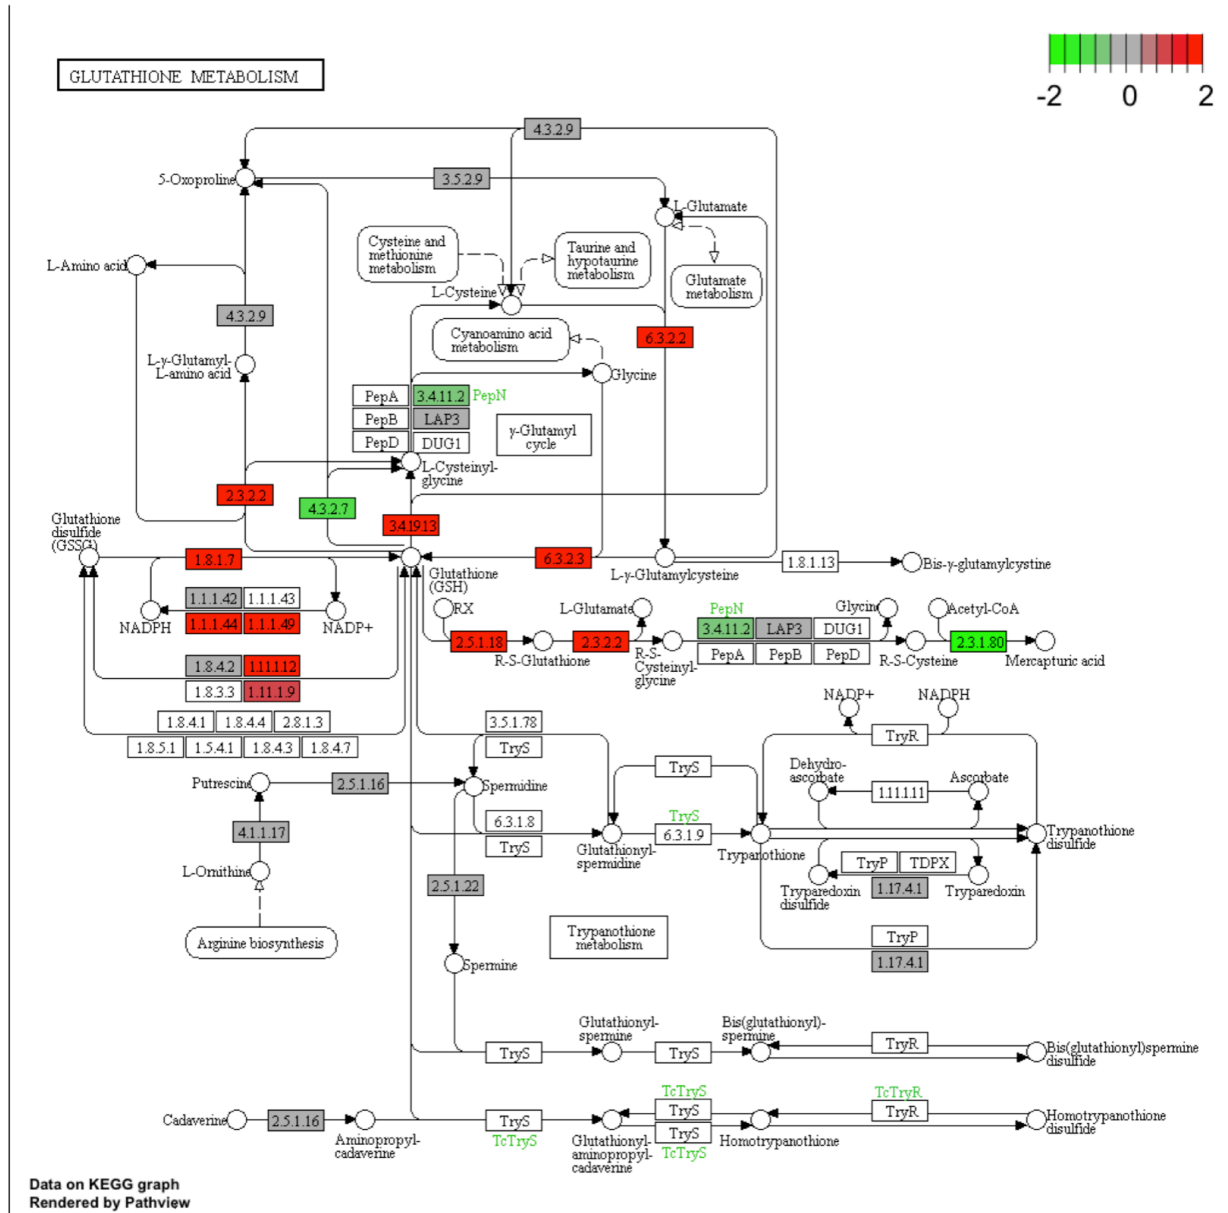

**P20 Nrf2 in *rd1* vs untreated *rd1***



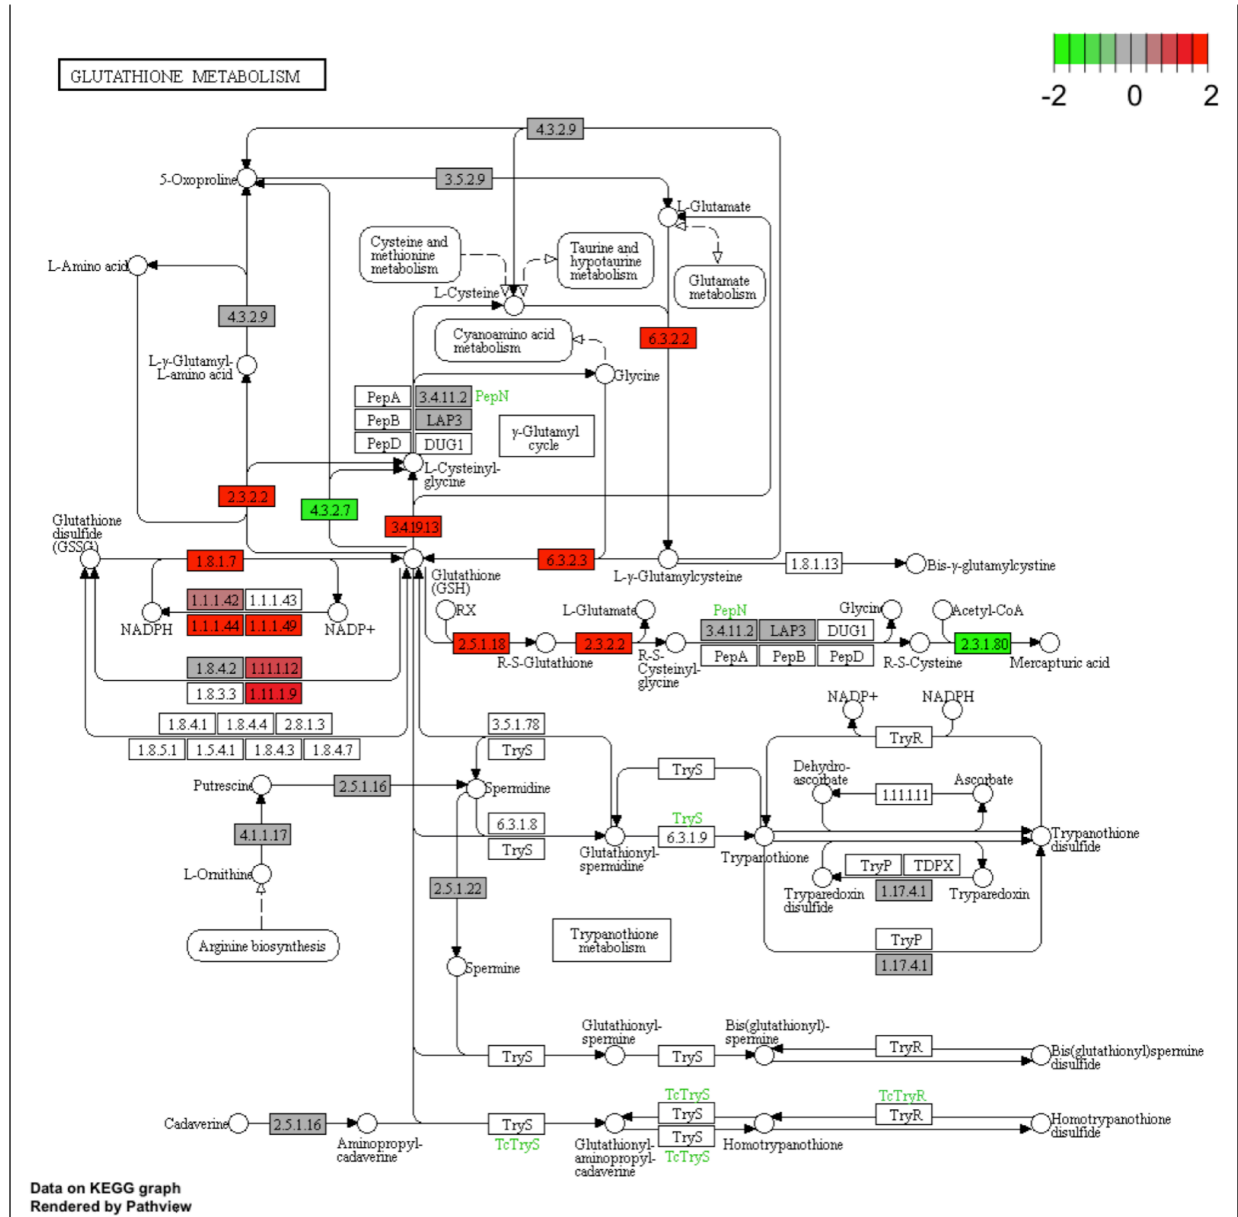

**P40 Nrf2 in *rd1* vs untreated *rd1***

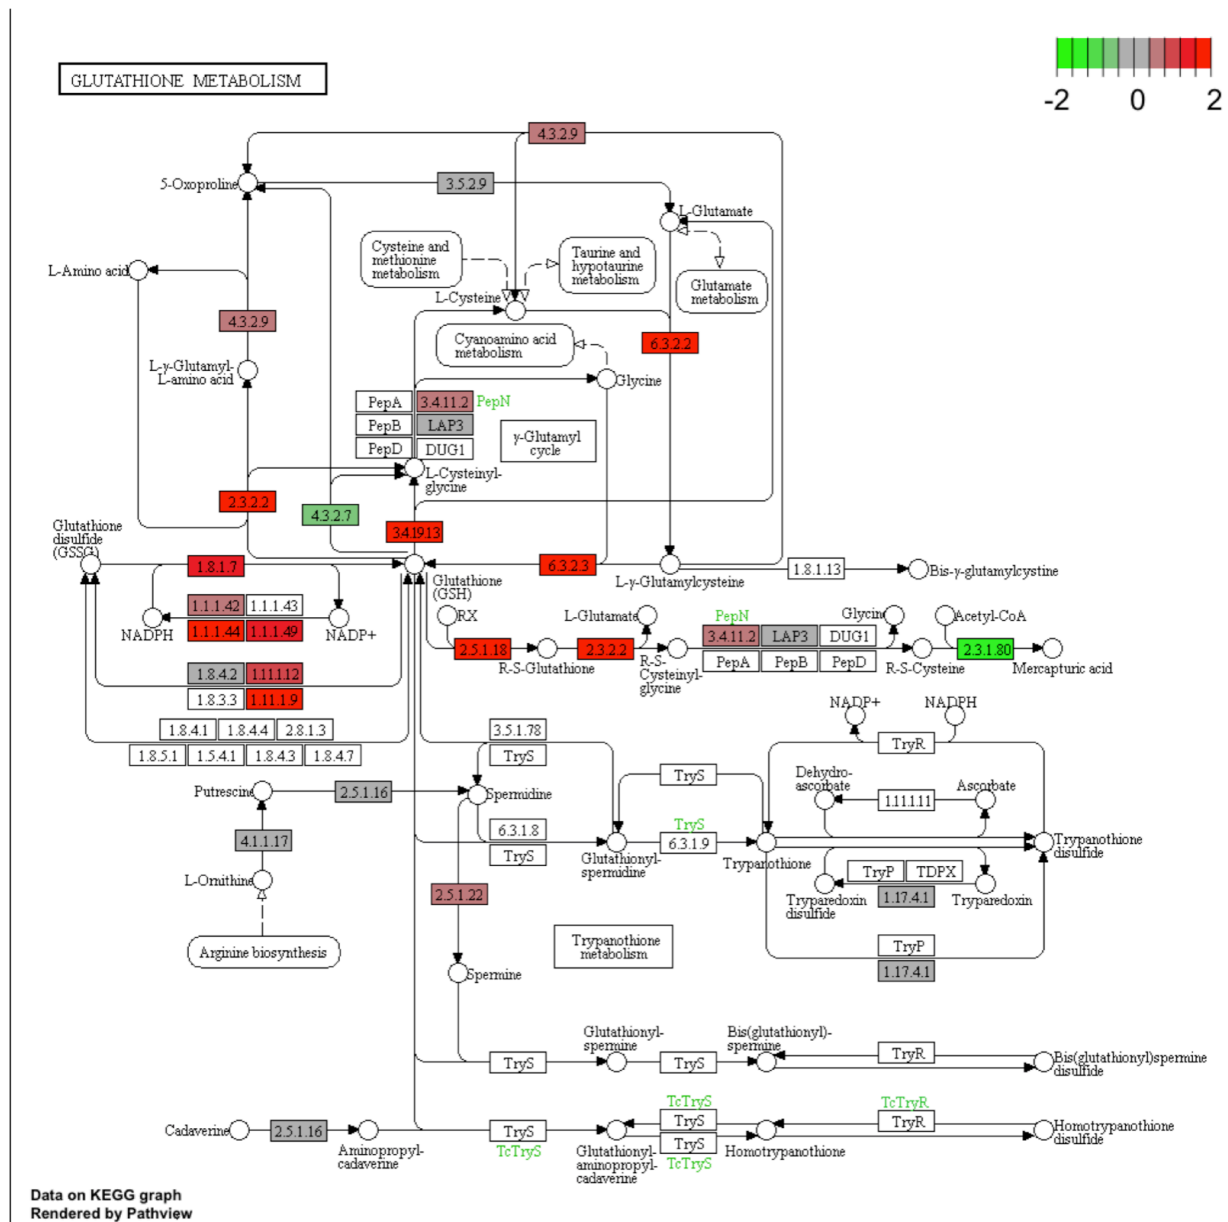

**P40 wild type**
